# Supplementary material for: High carbon emissions from thermokarst lakes of Western Siberia
Source: PubMed Central journal article supplement (PMC6449335; doi:10.1038/s41467-019-09592-1), 2019-04-04
Supplement: 41467_2019_9592_MOESM2_ESM.pdf [file 41467_2019_9592_MOESM2_ESM.pdf]

## Description of Additional Supplementary Information

File Name: Supplementary Dataset 1

Description: Dataset created and analyzed in this study. "NA" stands for missing values whereas "SD" represents standard deviation of the mean.

File Name: Supplementary Dataset 2

Description: List of all chamber measurements and flux estimates for each of the sampled lakes across seasons. "NA" stands for missing values
